# Supplementary material
Source: Springer Nature journal article supplement (https://www.springermedizin.de/resource/supplementary/12943_2011_902_MOESM7_ESM.pdf/9551952)

A

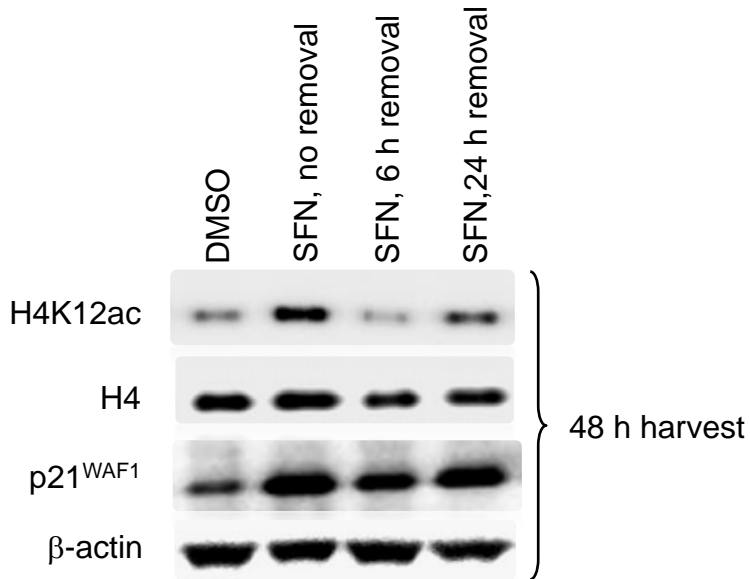

B

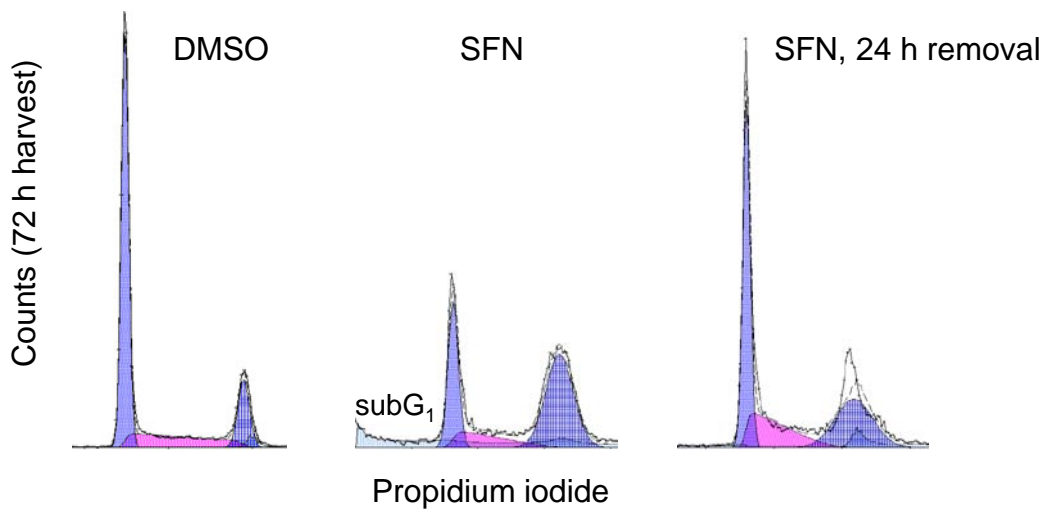

C

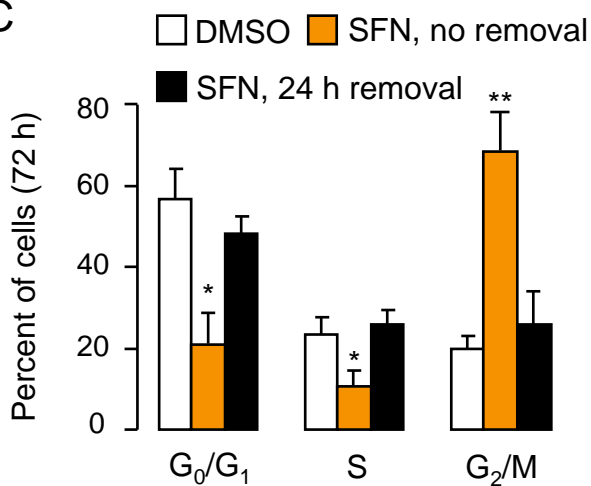

D

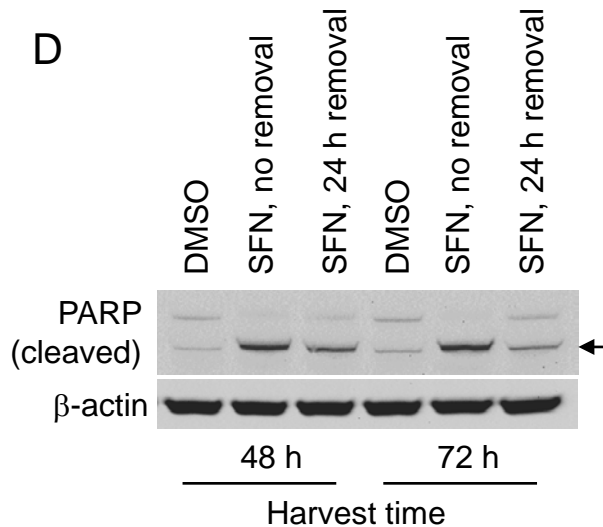

Supplement: MOESM7 [file 9551952]
